# Supplementary material for: Self-assembled monodisperse FeSe2 microflowers as an advanced anode material for sodium ion batteries
Source: Royal Society of Chemistry journal article supplement (doi:10.1039/d2se00256f), 2022-01-01
Supplement: d2se00256f1.pdf [file d2se00256f1.pdf]

Self-Assembled Monodisperse FeSe<sub>2</sub> Microflowers as Advanced Anode for Sodium  
Ion Batteries

Shengkai Li, Shangshang Zhang, Zhenjiang Liu, Changsheng Yang, Shuqi Zhang,  
Haiyan Zhang\*

School of Materials and Energy, Guangdong University of Technology, Guangzhou,  
510006, China.

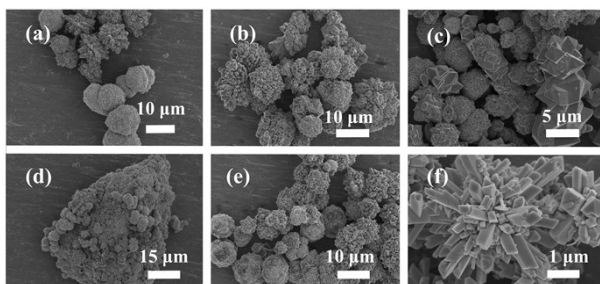

**Fig. S1** SEM images obtained under different conditions: V(DMF):(EtOH); **a** 1:0; **b** 4:1; **c** 0:1; **d** 120 °C; **e** 140 °C; **f** no TETA.

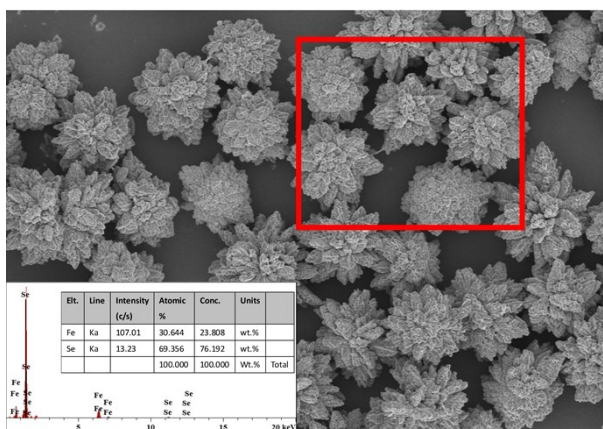

**Fig. S2** SEM and the inset displays the corresponding energy-dispersive spectrometer (EDS) and percentage of the Fe/Se elements.

\* Corresponding author. E-mail: [hyzhang@gdut.edu.cn](mailto:hyzhang@gdut.edu.cn) (Haiyan Zhang)

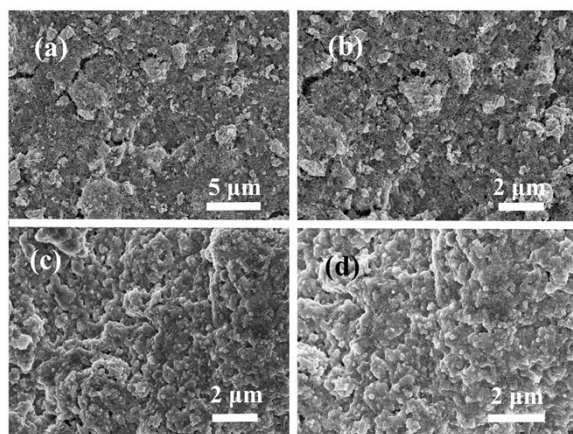

**Fig. S3** SEM images of (a,b) electrode before cycling and (c,d) electrode after 100 cycles.
